# Supplementary figures and images for: Sintering, Mechanical and Optical Properties of TiB2 Composites with and without High-Energy Milling
Source: MDPI journal article supplement (doi:10.3390/nano13192683), 2023-09-30

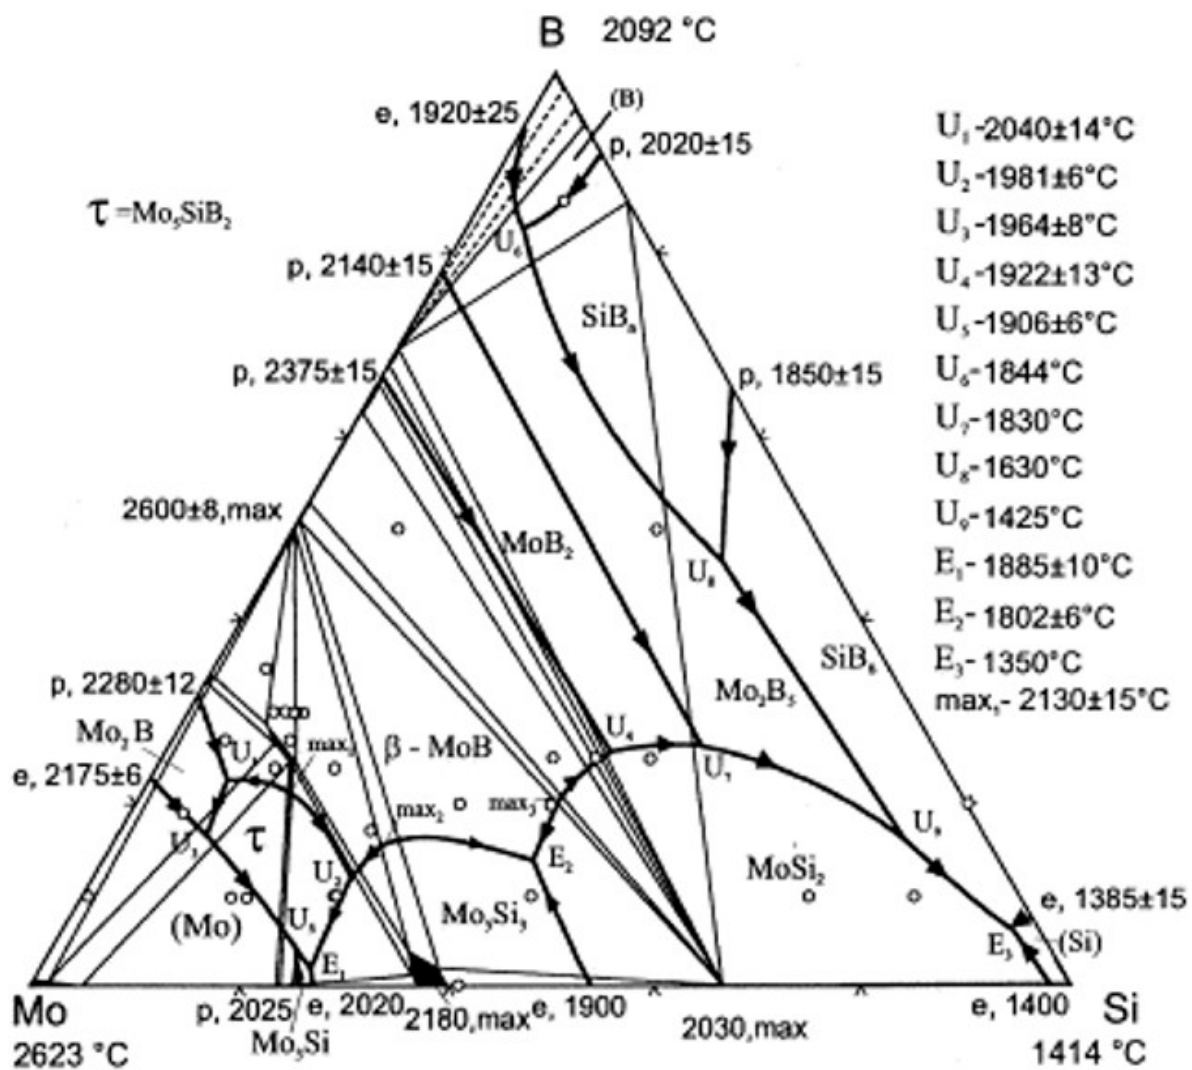

Figure S1. Melting diagram of Mo-Si-B system [67].

Supplement: s1 [file s1]
